# Supplementary material
Source: publisher figshare collection journal article supplement (https://gsapubs.figshare.com/ndownloader/files/25286732)
Supplement: Supplementary file 1 [file 25286732]

## Sheet: Sheet1
Table S3, Summary of Ar-Ar Step Heating Results
Sample:	CA-1		Material: nephelinite groundmass						J: 0.0091723232 +/- 1%			Blank Correction: Average of each day					Processed data and J value are 2σ
Step	40Ar	+/-	39Ar	+/-	38Ar	+/-	37Ar	+/-	36Ar	+/-	40Ar*/39Ar	+/-	Age	+/-	+/-(no J error)	39/40	+/-	36/40	+/-	37/39	+/-	38/39	+/-
step 1	0.341217	0.00579522	0.0181856	0.000270575	0.000409763	3.84792e-05	0.0089566	0.000139713	0.000877627	3.91965e-05	4.35469	0.721005	70.6577	11.4935	11.4726	0.0532962	0.00120339	0.00257205	0.000122898	0.492511	0.010617	0.0225323	0.00214231
step 2	1.14681	0.00595661	0.0945719	0.00059893	0.00159538	5.61436e-05	0.0556095	0.000139749	0.00219526	7.44068e-05	5.19599	0.245413	83.995	3.96219	3.87626	0.082465	0.000675438	0.00191423	6.56388e-05	0.588013	0.0040064	0.0168695	0.000603197
step 3	2.3433	0.00633035	0.242177	0.000762158	0.0035169	4.7031e-05	0.101982	0.000139818	0.00341297	5.60034e-05	5.46843	0.0758041	88.293	1.47283	1.19446	0.103348	0.000428643	0.00145648	2.42211e-05	0.421108	0.00144557	0.0145221	0.000199506
step 4	8.04579	0.00830269	1.02025	0.00177058	0.0126646	0.000165178	0.520573	0.000139937	0.00730205	7.441e-05	5.74926	0.0252967	92.7128	0.987316	0.39763	0.126806	0.000256029	0.000907561	9.29561e-06	0.510241	0.000896051	0.0124132	0.000163326
step 5	2.44339	0.00632146	0.34932	0.0010083	0.0039564	0.000155065	0.292063	0.000140052	0.0014326	6.50885e-05	5.77029	0.0608248	93.0433	1.31762	0.955909	0.142965	0.000554165	0.000586317	2.66817e-05	0.836092	0.00244644	0.011326	0.000445109
step 6	7.9171	0.00652494	1.18074	0.0020595	0.0139524	0.000195583	1.37979	0.000140127	0.00379436	6.5113e-05	5.74576	0.0200513	92.6577	0.956599	0.315189	0.149138	0.00028771	0.000479261	8.23383e-06	1.16858	0.00204173	0.0118166	0.000166921
step 7	3.42204	0.00939908	0.544183	0.00149216	0.00619476	0.000114808	0.852461	0.000140242	0.0012041	3.92128e-05	5.62779	0.0316115	90.8023	1.01569	0.497417	0.159023	0.000617177	0.000351865	1.14996e-05	1.5665	0.00430308	0.0113836	0.000213269
step 8	3.22933	0.00663283	0.525565	0.0013685	0.00662404	0.000155065	1.46393	0.000140316	0.000942058	4.733e-05	5.60933	0.0330986	90.5119	1.02501	0.5209	0.162747	0.000539742	0.000291719	1.46685e-05	2.78545	0.00725784	0.0126037	0.000296864
step 9	5.28737	0.00743192	0.85386	0.00131702	0.0111417	0.000175303	2.9036	0.000140391	0.00179054	6.5201e-05	5.56623	0.0258693	89.8334	0.966352	0.407281	0.161491	0.000337001	0.000338646	1.23406e-05	3.40056	0.0052477	0.0130486	0.00020629
step 10	4.40656	0.00623994	0.725349	0.002337	0.00933336	0.000134199	2.66673	0.000165844	0.00119485	6.20989e-05	5.58327	0.0324182	90.1017	1.01629	0.510309	0.164607	0.00057931	0.000271154	1.40976e-05	3.67648	0.0118475	0.0128674	0.000189602
step 11	2.64708	0.00713506	0.439108	0.00128388	0.00588894	8.39081e-05	1.82784	0.000165903	0.00068716	3.39066e-05	5.56111	0.032556	89.7528	1.01457	0.512577	0.165884	0.00065967	0.000259592	1.28281e-05	4.16263	0.0121767	0.0134112	0.00019507
step 12	2.54282	0.00678991	0.421525	0.0003598	0.00571518	0.000113996	1.56155	0.00016598	0.000697729	3.38832e-05	5.53823	0.0292876	89.3925	0.986579	0.46121	0.165771	0.000464712	0.000274392	1.33452e-05	3.70451	0.00318648	0.0135583	0.000270685
step 13	4.97527	0.0127208	0.835331	0.00163479	0.0107234	0.000215463	3.14832	0.000166021	0.00115723	4.31415e-05	5.54243	0.0242346	89.4586	0.952553	0.381624	0.167897	0.0005406	0.000232597	8.69157e-06	3.76895	0.00737872	0.0128373	0.000259157
step 14	3.46967	0.00701338	0.574154	0.00100549	0.00786156	0.000113996	2.25941	0.00016614	0.000852796	3.39522e-05	5.59964	0.0236025	90.3594	0.956427	0.371484	0.165478	0.000442564	0.000245786	9.79803e-06	3.93519	0.0068976	0.0136924	0.000199989
step 15	3.49831	0.016409	0.583422	0.00118073	0.007882	0.000134199	1.86533	0.000166185	0.000777227	3.39101e-05	5.59844	0.0349362	90.3405	1.03865	0.549874	0.166773	0.000851963	0.000222172	9.74916e-06	3.19721	0.0064768	0.0135099	0.00023164
step 16	2.74897	0.00629691	0.461584	0.00130451	0.00613424	0.000124088	1.38723	0.000166272	0.000633923	4.29787e-05	5.54549	0.0347063	89.5069	1.03014	0.546508	0.167911	0.000610841	0.000230604	1.56434e-05	3.00537	0.00850126	0.0132895	0.000271442
step 17	3.53144	0.00595993	0.586593	0.000665952	0.00782068	7.39837e-05	1.7417	0.000166345	0.000929989	3.38986e-05	5.54692	0.0209897	89.5294	0.933882	0.330513	0.166106	0.000337858	0.000263345	9.60936e-06	2.96917	0.00338277	0.0133324	0.000127029
step 18	1.56553	0.00515706	0.262281	0.000933351	0.00333373	8.39081e-05	0.706231	0.000166431	0.000394387	3.38329e-05	5.51995	0.0474941	89.1046	1.14691	0.748038	0.167535	0.000812415	0.00025192	2.16271e-05	2.69265	0.00960302	0.0127105	0.000323098
Sample:	CA-2		Material: nephelinite groundmass						J: 0.009128823 +/- 1%			Blank Correction: Average of each day					Processed data and J value are 2σ
Step	40Ar	+/-	39Ar	+/-	38Ar	+/-	37Ar	+/-	36Ar	+/-	40Ar*/39Ar	+/-	Age	+/-	+/-(no J error)	39/40	+/-	36/40	+/-	37/39	+/-	38/39	+/-
Step 1	2.04572	0.00549094	0.0692791	0.000320284	0.00280409	0.000113931	0.031875	0.000154014	0.00558405	9.13898e-05	5.46412	0.402536	87.8167	6.37234	6.31443	0.0338653	0.000181037	0.00272962	4.52704e-05	0.460096	0.00307678	0.0404752	0.00165513
Step 2	13.997	0.0228391	0.717877	0.00108815	0.0265369	0.000450095	0.172472	0.000154052	0.0328668	0.000190662	5.82867	0.0858951	93.5262	1.62319	1.34315	0.051288	0.000114225	0.00234814	1.41503e-05	0.240254	0.000422696	0.0369658	0.00062948
Step 3	1.75151	0.00505649	0.127714	0.000533171	0.00453141	0.000103858	0.0306214	0.000154176	0.00340439	6.20652e-05	5.75581	0.152303	92.3866	2.54758	2.38308	0.0729165	0.000370101	0.00194368	3.58767e-05	0.239765	0.00156819	0.0354809	0.000826587
Step 4	9.86738	0.0177862	1.054	0.00112938	0.0419091	0.000337792	0.297944	0.000154274	0.0124135	0.000111141	5.84551	0.0362644	93.7895	1.07552	0.566986	0.106817	0.000223991	0.00125804	1.14894e-05	0.282678	0.000336405	0.0397617	0.000323304
Step 5	7.51277	0.0153997	0.972774	0.0012428	0.0420521	0.00041946	0.404846	0.000154367	0.00622522	5.24631e-05	5.81242	0.0237702	93.2721	0.982094	0.371748	0.129483	0.000312746	0.000828618	7.18678e-06	0.416177	0.000554878	0.0432291	0.000434722
Step 6	8.2296	0.0100975	1.05876	0.00141818	0.0471728	0.000215428	0.433623	0.000154447	0.00711759	0.000130967	5.76576	0.0389169	92.5422	1.08834	0.608878	0.128653	0.000233697	0.000864877	1.59495e-05	0.409556	0.00056765	0.0445546	0.000212043
Step 7	4.14644	0.00444047	0.560924	0.00104072	0.0281153	0.000287482	0.419508	0.000316573	0.00341338	5.20281e-05	5.57534	0.0306033	89.5606	0.99671	0.479598	0.135278	0.0002898	0.000823206	1.25786e-05	0.747887	0.00149799	0.0501232	0.000520884
Step 8	12.742	0.0145774	1.78002	0.00342315	0.0887658	0.000562809	1.3148	0.000316733	0.00986612	0.000101043	5.50348	0.0215941	88.4341	0.92707	0.338623	0.139698	0.000312596	0.000774302	7.97925e-06	0.738644	0.00143158	0.0498677	0.000330404
Step 9	4.48246	0.00348653	0.657458	0.0015654	0.0383771	0.000470951	0.701587	0.000316955	0.00288862	5.20335e-05	5.5061	0.0275377	88.4751	0.965366	0.431816	0.146674	0.00036739	0.000644429	1.16191e-05	1.06712	0.00258613	0.0583718	0.000729678
Step 10	11.5986	0.0118865	1.71031	0.00286548	0.104618	0.000767049	2.43275	0.000317124	0.00774987	6.17819e-05	5.42871	0.0157271	87.2612	0.886869	0.246781	0.147459	0.000289608	0.000668173	5.37051e-06	1.4224	0.00239031	0.0611692	0.000460046
Step 11	10.3528	0.0135619	1.51771	0.00218418	0.106243	0.0005526	3.02117	0.000317359	0.00754393	0.000101107	5.33727	0.0231179	85.8257	0.913407	0.363042	0.1466	0.000285291	0.000728688	9.81273e-06	1.99061	0.00287235	0.0700023	0.00037778
Step 12	6.88992	0.0104838	1.00394	0.0014624	0.0795466	0.000440343	2.58113	0.000317525	0.00538055	0.000110988	5.26279	0.0354578	84.6557	0.997191	0.55719	0.145711	0.000306935	0.000780931	1.61525e-05	2.57101	0.00375845	0.0792348	0.000453549
Step 13	6.52819	0.00663478	0.948072	0.00178187	0.0745997	0.0005526	2.505	0.000317834	0.00475072	8.13488e-05	5.38969	0.0284229	86.6488	0.956439	0.446148	0.145227	0.000310302	0.000727724	1.24831e-05	2.6422	0.00497725	0.0786858	0.000601336
Step 14	7.9754	0.00978443	1.12794	0.00203974	0.0964826	0.000562809	3.69404	0.000318039	0.00669563	7.1628e-05	5.29847	0.0229461	85.2164	0.90705	0.360466	0.141427	0.000309055	0.000839535	9.03999e-06	3.27503	0.00592922	0.0855388	0.000522398
Step 15	7.0884	0.00803387	1.02279	0.00098947	0.0839416	0.000664916	3.08575	0.0003182	0.00551682	8.13839e-05	5.32005	0.0255453	85.5553	0.926917	0.401222	0.144291	0.000215011	0.000778289	1.15151e-05	3.01699	0.00293524	0.0820711	0.00065493
Step 16	2.836	0.00239745	0.412194	0.00154801	0.0328204	0.000349723	1.18341	0.000364925	0.002111	8.16634e-05	5.35122	0.0627414	86.0448	1.29483	0.985168	0.145344	0.000559503	0.000744358	2.88022e-05	2.87102	0.0108185	0.0796237	0.000899597
Step 17	6.47697	0.00263338	0.894979	0.0018227	0.0725897	0.00050236	3.00956	0.00036512	0.00547707	0.000101402	5.4099	0.0356977	86.9659	1.01721	0.56024	0.138178	0.000286965	0.000845621	1.56595e-05	3.36271	0.00686059	0.0811077	0.00058511
Step 18	4.33127	0.00270961	0.628205	0.0010952	0.0465674	0.000298997	1.84594	0.00036539	0.00315543	6.22289e-05	5.39502	0.0313327	86.7325	0.979257	0.4918	0.14504	0.000268646	0.000728523	1.43746e-05	2.93844	0.00515573	0.0741277	0.000493188
Step 19	5.13801	0.0100198	0.728054	0.00175135	0.0531599	0.000268631	2.26054	0.000365476	0.00389556	7.19404e-05	5.45969	0.0351029	87.7472	1.01822	0.550668	0.1417	0.0004388	0.000758185	1.40795e-05	3.1049	0.00748574	0.0730163	0.000408644

## Sheet: G48019
Rochelle-Bates, N., et al., 2020, Geochronology of volcanically associated hydrocarbon charge in the pre-salt carbonates of the Namibe Basin, Angola: Geology, v. 49, https://doi.org/10.1130/G48019.1
